# Supplementary material for: Modeling the cellular impact of nanoshell-based biosensors using mouse alveolar macrophage cultures
Source: Royal Society of Chemistry journal article supplement (doi:10.1039/c1mt00089f), 2011-01-01
Supplement: c1mt00089f.pdf [file c1mt00089f.pdf]

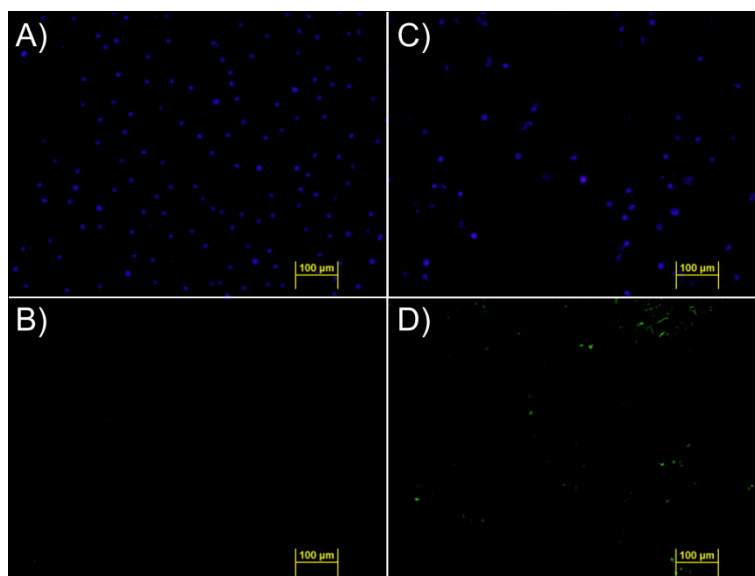

Supplementary Figure 1. Fluorescence imaging of nuclei labeled by Hoechst 33342 (blue) and the presence of ROS detected by Image-iTTM (green) in plain macrophage cells (A,B) with ROS inducer TBHP; (C,D) without ROS inducer TBHP

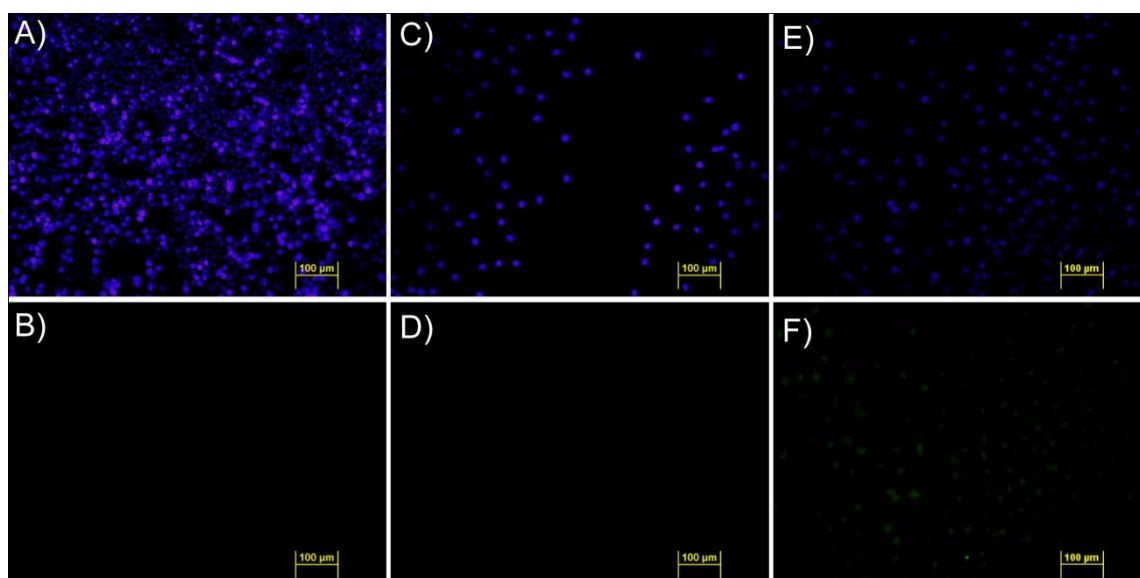

Supplementary Figure 2. Fluorescence imaging of nuclei labeled by Hoechst 33342 (blue) and the presence of ROS detected by Image-iTTM (green) in plain macrophage cells treated by (A,B) 3x10<sup>7</sup> NS/mL Plain NS; (C,D) 3x10<sup>8</sup> NS/mL Plain NS; (E,F) 3x10<sup>9</sup> NS/mL Plain NS.

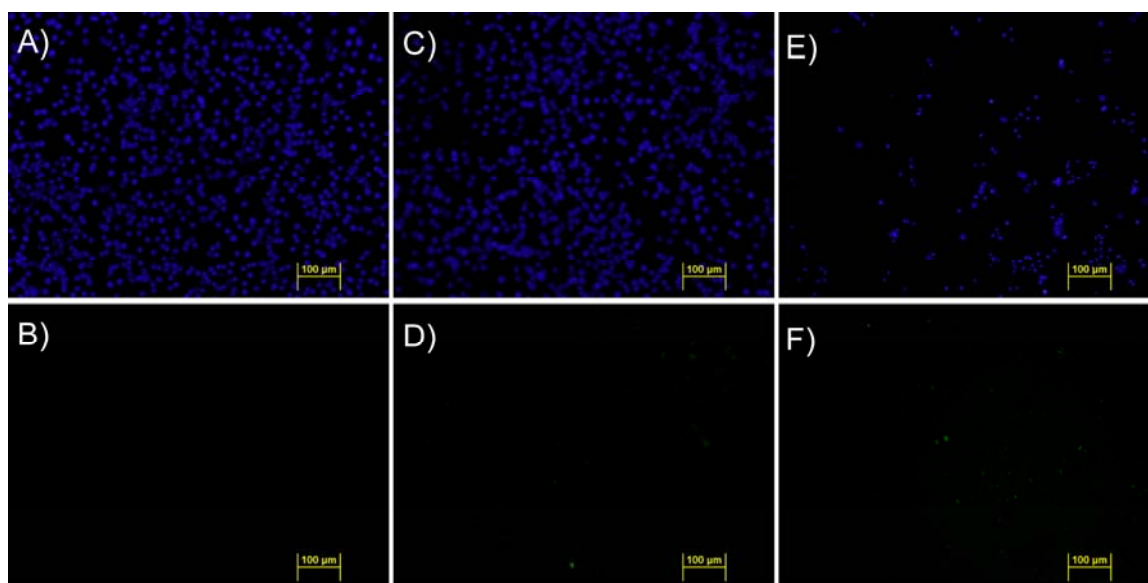

Supplementary Figure 3: Fluorescence imaging of nuclei labeled by Hoechst 33342 (blue) and the presence of ROS (green) detected by Image-iT™ in plain macrophage cells treated by (A,B) 3x10<sup>7</sup> NS/mL pMA-PEG NS; (C,D) 3x10<sup>8</sup> NS/mL pMA-PEG NS; (E,F) 3x10<sup>9</sup> NS/mL pMA-PEG NS.

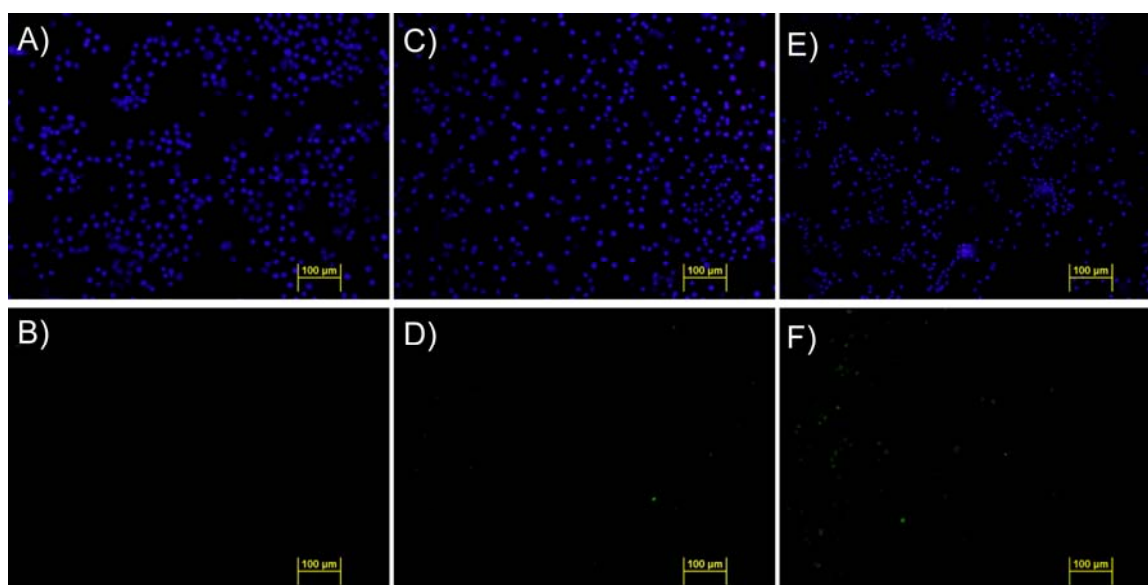

Supplementary Figure 4: Fluorescence imaging of nuclei labeled by Hoechst 33342 (blue) and the presence of ROS (green) detected by Image-iT™ in plain macrophage cells treated by (A,B) 3x10<sup>7</sup> NS/mL PEG-SH NS; (C,D) 3x10<sup>8</sup> NS/mL PEG-SH NS; (E,F) 3x10<sup>9</sup> NS/mL PEG-SH NS.
